# Supplementary material for: Local CD34-positive capillaries decrease in mouse models of kidney disease associating with the severity of glomerular and tubulointerstitial lesions
Source: PubMed Central journal article supplement (PMC5584339; doi:10.1186/s12882-017-0694-3), 2017-09-04
Supplement: 12882_2017_694_MOESM2_ESM.pdf [file 12882_2017_694_MOESM2_ESM.pdf]

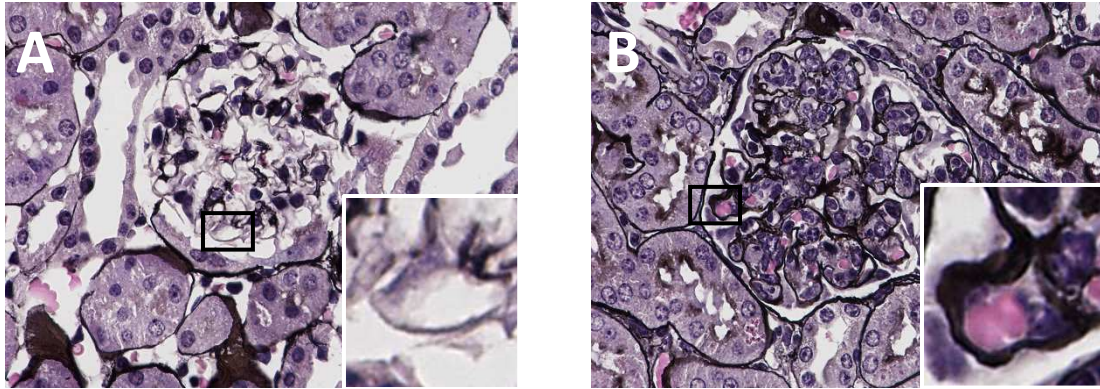

**Additional file 2: Thickening of glomerular basement membranes (GBMs) in Glomerular lesion model mice .**

A. BXSB/MpJ mice show normal glomerular basement membranes.

B. BXSB/MpJ-Yaa shows thickening of GBMs by periodic acid methanamine silver (PAM) staining. All bars = 100  $\mu$ m.
