# Supplementary material for: Local CD34-positive capillaries decrease in mouse models of kidney disease associating with the severity of glomerular and tubulointerstitial lesions
Source: PubMed Central journal article supplement (PMC5584339; doi:10.1186/s12882-017-0694-3), 2017-09-04
Supplement: 12882_2017_694_MOESM4_ESM.pdf [file 12882_2017_694_MOESM4_ESM.pdf]

**Additional file 4:** Quantitative evaluation of indices for tubulointerstitial histopathology in GL and TIL model mice.

| Parameters       |                      | Indices for tubulointerstitial histopathology |                                     |                                         |                                                    |                                                        |                                           |
|------------------|----------------------|-----------------------------------------------|-------------------------------------|-----------------------------------------|----------------------------------------------------|--------------------------------------------------------|-------------------------------------------|
|                  |                      | Ti. B220 <sup>+</sup> B-cells/cortex          | Ti. CD3 <sup>+</sup> T-cells/cortex | Ti. Iba1 <sup>+</sup> macrophages/focus | Ti. $\alpha$ SMA <sup>+</sup> myofibroblasts/focus | IL-1F6/IL-36 $\alpha$ <sup>+</sup> renal tubules/focus | CD34+tubulointerstitial capillaries/focus |
| <b>GL model</b>  | BXSB/MpJ             | 104.75±16.7 <sup>b#</sup>                     | 59.75±7.27 <sup>b# bd*</sup>        | 12.43±0.88 <sup>b# bd*</sup>            | 0                                                  | 1.25±1.25 <sup>d**</sup>                               | 44.52±2.76 <sup>d**</sup>                 |
|                  | BXSB/MpJ- <i>Yaa</i> | 263±85.9 <sup>a# acd*</sup>                   | 362.75±133.06 <sup>a# acd*</sup>    | 45.25±8.91 <sup>a# acd*</sup>           | 0                                                  | 58.5±24.38 <sup>d**</sup>                              | 44.51±0.6 <sup>d**</sup>                  |
| <b>TIL model</b> | Control kidney       | 25.75±6.9 <sup>d#</sup>                       | 65.5±6.75 <sup>d# bd*</sup>         | 17.51±1.31 <sup>d# bd*</sup>            | 1463.06±39.12 <sup>d#</sup>                        | 0                                                      | 49.22±3.12 <sup>d**</sup>                 |
|                  | UUO kidney           | 136±6.14 <sup>c# b*</sup>                     | 707±55.48 <sup>c# ac**b*</sup>      | 70.73±5.2 <sup>c# ac**b*</sup>          | 14579±78.62 <sup>c#</sup>                          | 329.66±11.01 <sup>c# abc*</sup>                        | 24.4±1.86 <sup>c# abc*</sup>              |

Values = mean ± SE. #: Significant difference from the control in the same disease group, Mann-Whitney *U* test ( $p < 0.05$ ). \* Significant difference from the other groups, Kruskal-Wallis test followed by Scheffe's method (\*  $p < 0.05$ , \*\*  $p < 0.01$ ). N = 4. Ti.: tubulointerstitial; GLs: glomerular lesions; TILs: tubulointerstitial lesions. a, b, c and d denotes BXSB/MpJ, BXSB/MpJ-*Yaa*, Control and UUO kidney, respectively.
