# Supplementary material for: Local CD34-positive capillaries decrease in mouse models of kidney disease associating with the severity of glomerular and tubulointerstitial lesions
Source: Springer Nature journal article supplement (doi:10.1186/s12882-017-0694-3), 2017-09-04
Supplement: MOESM3 [file 14976478]

**Additional file 3:** Quantitative evaluation of indices for glomerular histopathology in GL and TIL model mice.

| Parameters |                      | Indices for glomerular histopathology |                              |                            |                                |                               |                                    |                                    |
|------------|----------------------|---------------------------------------|------------------------------|----------------------------|--------------------------------|-------------------------------|------------------------------------|------------------------------------|
|            |                      | Glo. Size ( $\mu\text{m}^2$ )         | Cell number/glo.             | Glo. damage score          | B220 <sup>+</sup> B-cells/Glo. | CD3 <sup>+</sup> T-cells/Glo. | Iba1 <sup>+</sup> macrophages/Glo. | CD34 <sup>+</sup> capillaries/Glo. |
| GL model   | BXSB/MpJ             | 3850±116.35 <sup>b#</sup>             | 35.91±1.4 <sup>b#</sup>      | 18.25±9.8 <sup>b#</sup>    | 0.26±0.03 <sup>b#</sup>        | 0.12±0.04 <sup>b#</sup>       | 0.13±0.02 <sup>b#</sup>            | 17.29±0.87 <sup>b#</sup>           |
|            | BXSB/MpJ- <i>Yaa</i> | 6771.94±446.32 <sup>a#acd**</sup>     | 71.85±3.3 <sup>a#acd**</sup> | 206.25±36.29 <sup>a#</sup> | 1.63±0.57 <sup>a#acd*</sup>    | 1.79±0.45 <sup>a#acd*</sup>   | 3.57±0.4 <sup>a#acd*</sup>         | 9.68±1.25 <sup>a#ac*</sup>         |
| TIL model  | Control kidney       | 3161.13±0.53 <sup>b**</sup>           | 31.88±0.53 <sup>b**</sup>    | 0                          | 0.18±0.04 <sup>b*</sup>        | 0.13±0.02 <sup>b*</sup>       | 0.07±0.01 <sup>b*</sup>            | 13.3±0.42 <sup>b*</sup>            |
|            | UUO kidney           | 3010±64.5 <sup>b**</sup>              | 31.31±0.47 <sup>b**</sup>    | 0                          | 0.22±0.03 <sup>b*</sup>        | 0.08±0.01 <sup>b*</sup>       | 0.03±0.0 <sup>b*</sup>             | 12.56±0.19                         |

Values = mean ± SE. #: Significant difference from the control in the same disease group, Mann-Whitney *U* test ( $p < 0.05$ ). \*: Significant difference from the other groups, Kruskal-Wallis test followed by Scheffe's method (\* $p < 0.05$ , \*\* $p < 0.01$ ). N = 4. Glo.: glomerular; Pod: podocyte; GLs: glomerular lesions; TILs: tubulointerstitial lesions. a, b, c and d denotes BXSB/MpJ, BXSB/MpJ-*Yaa*, Control and UUO kidney, respectively.
